# Supplementary material for: Costunolide covalently targets NACHT domain of NLRP3 to inhibit inflammasome activation and alleviate NLRP3-driven inflammatory diseases
Source: PubMed Central journal article supplement — Acta Pharm Sin B. 2022 Sep 25;13(2):678–93. doi: 10.1016/j.apsb.2022.09.014 (PMC9978959; doi:10.1016/j.apsb.2022.09.014), 2022-09-25
Supplement: mmc1.pdf [file mmc1.pdf]

## Supporting Information for

Original article

### **Costunolide covalently targets NACHT domain of NLRP3 to inhibit inflammasome activation and alleviate NLRP3-driven inflammatory diseases**

**Haowen Xu<sup>a,b</sup>, Jiahao Chen<sup>a</sup>, Pan Chen<sup>a</sup>, Weifeng Li<sup>a</sup>, Jingjing Shao<sup>a,b</sup>, Shanshan Hong<sup>a</sup>, Yi Wang<sup>a</sup>, Lingfeng Chen<sup>b</sup>, Wu Luo<sup>a,c,\*</sup>, Guang Liang<sup>a,b,\*</sup>**

<sup>a</sup>*Chemical Biology Research Center, School of Pharmaceutical Sciences, Wenzhou Medical University, Wenzhou 325035, China*

<sup>b</sup>*School of Pharmaceutical Sciences, Hangzhou Medical College, Hangzhou 311399, China*

<sup>c</sup>*Medical Research Center, the First Affiliated Hospital of Wenzhou Medical University, Wenzhou 325000, China*

Received 10 May 2022; received in revised form 21 July 2022; accepted 2 September 2022

**\*Corresponding authors.** Tel./fax: +86 577 86699396.

E-mail addresses: [wzmcliangguang@163.com](mailto:wzmcliangguang@163.com) (Guang Liang), [wuluo@wmu.edu.cn](mailto:wuluo@wmu.edu.cn) (Wu Luo).

#### **Contents in Supporting Information**

**Table S1**

**Figs. S1–S15**

**Table S1** List of 119 natural compounds.

| No. | 1                                                 | 2                  | 3                                           | 4                          | 5                 | 6                                     | 7                           | 8                                                 | 9                            | 10                             | 11                          | 12                       | 13              | 14             | 15                 | 16                              | 17             |
|-----|---------------------------------------------------|--------------------|---------------------------------------------|----------------------------|-------------------|---------------------------------------|-----------------------------|---------------------------------------------------|------------------------------|--------------------------------|-----------------------------|--------------------------|-----------------|----------------|--------------------|---------------------------------|----------------|
| 1   | Artemisinic acid                                  | Engeletin          | 8- <i>O</i> -Acetylshanzhiside methyl ester | Rutin                      | Rapamycin         | Praeruptorin A                        | 4-Methylesculetin           | coniferin                                         | 5-Methyl-7-methoxyisoflavone | 7,8-Dihydroxy-4-phenylcoumarin | Jatrorrhizine hydrochloride | Chrysin                  | Pregnenolone    | Reserpine      | Methyl eugenol     | Methyl cholate                  | Salidroside    |
| 2   | Skimmin                                           | Salvianolic acid A | Geniposide                                  | Imperatorin                | Artemisinin       | Hydroxyprogesterone                   | Astrasieversianin VII       | Tubeimoside II                                    | Notoginsenoside Fa           | 8- <i>O</i> -Acetylharpagide   | Caffeic Acid                | Khellin                  | Casanthranol    | Isorhamnetin   | Coenzyme Q10       | Aleuritic acid                  | Esculin        |
| 3   | Acetylcimigenol 3- <i>O</i> -alpha-L-arabinopyran | Baicalcin          | (+)-Pteryxin                                | Alismoxide                 | Dehydroevodiamine | Notopterol                            | Hyoscyamine sulfate hydrate | Tuberstemonine                                    | Thiocolchicoside             | Plantagoside                   | Berbamine dihydrochloride   | Aloin                    | Isoimperatorin  | Spinosin       | Quercetin          | <i>Trans</i> -Zeatin Riboside   | Aminophylline  |
| 4   | Picfeltaerarin IA                                 | Sucralose          | Gossypol acetic acid                        | Ecliptasaponin A           | Nonacosane        | Mandelic acid                         | <i>N</i> -Benzylpalmitamide | 5 $\beta$ -Pregnane-3 $\alpha$ ,20 $\alpha$ -diol | Picroside II                 | Khasianine                     | Farrerol                    | Oxysophocarpine          | 2'-Deoxyinosine | Thymopentin    | Bilobetin          | Liensinine diperchlorate        | Costunolide    |
| 5   | Ganoderic acid G                                  | Corydaline         | Vinblastine sulfate                         | Azelaic acid               | Harpagide         | Arbutin                               | Chenodeoxycholic acid       | Thymol                                            | Cryptotanshinone             | (-)-Epicatechin gallate        | Corilagin                   | Penicillin G sodium salt | Resveratrol     | Hydrocortisone | Toddalolactone     | Sec- <i>O</i> -Glucosylhamaudol | Phellodendrine |
| 6   | Yangonin                                          | Gigantol           | 5-Acetylsalicylic acid                      | Cycloctidine hydrochloride | Rosmarinic acid   | Epicatechin                           | Cinnamic aldehyde           | Riboflavin                                        | Aristolochic acid            | Tubuloside A                   | Panaxadiol                  | (+)-Catechin hydrate     | Oxymatrine      | ADP            | Secoxyloganin      | Pseudolaric acid A              | L-Thyroxine    |
| 7   | SN38                                              | Chlorogenic Acid   | 6-Hydroxyflavone                            | Schizandrin B              | Ginsenoside Rb1   | 5-Hydroxy-1,7-diphenyl-6-hepten-3-one | Pterostilbene               | Genistein                                         | Apigenin                     | Schizandrin A                  | Isocorynoxine               | Hederasaponin B          | Betulinic acid  | Blimin         | Notoginsenoside Fe | Isotretinoin                    | Laurocapram    |

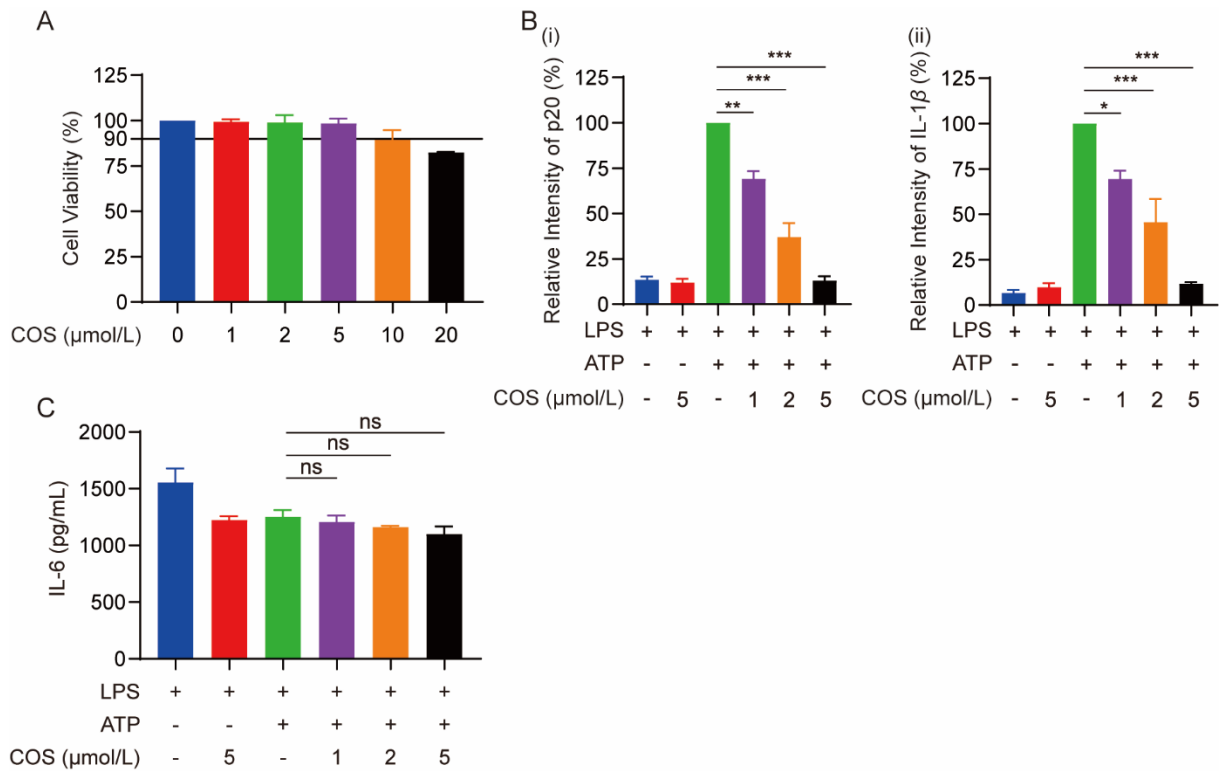

### Supplementary Figure S1

(A) BMDMs were pretreated with different doses of COS for 24 h, cell counting kit-8 assay was evaluated for cellular viability. (B) Densitometric quantification of p20 (i) and IL-1 $\beta$  (ii) described in Fig. 1C. (C) IL-6 production was measured by ELISA in SN from LPS-primed BMDMs treated with or without COS for 0.5 h, and stimulated with ATP for 0.5 h. Data are presented as the mean  $\pm$  SEM,  $n = 3$ ; \* $P < 0.05$ , \*\* $P < 0.01$ , \*\*\* $P < 0.001$ ; ns, not significant.

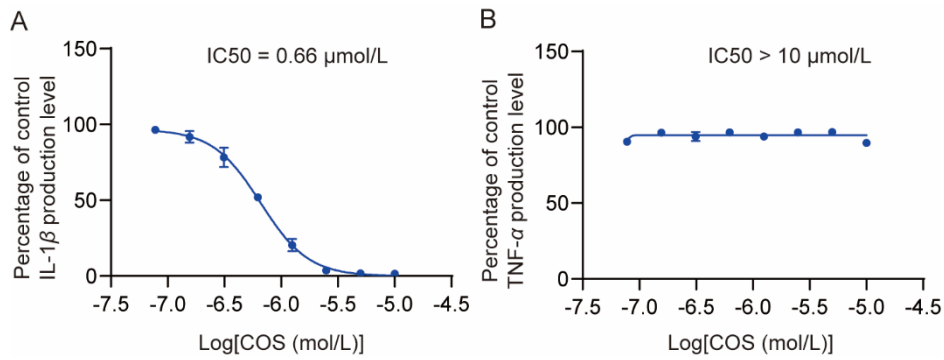

### Supplementary Figure S2

BMDMs were primed with LPS for 3 h and then pretreated with different doses of COS for 30 min and stimulated with ATP for 30 min. Production of IL-1 $\beta$  (**A**) and TNF- $\alpha$  (**B**) was measured by ELISA and then the level is normalized to that of DMSO-treated control cells. Nonlinear regression analysis was performed, and the curve of Log[COS ( $\mu$ mol/L)] *versus* the normalized response is presented ( $n = 3$ ).

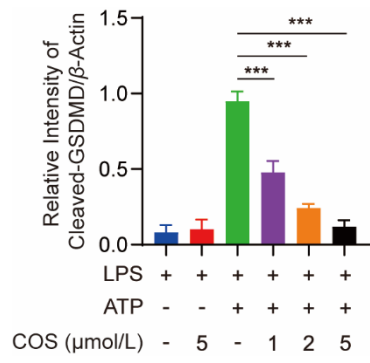

### Supplementary Figure S3

Densitometric quantification of cleaved-GSDMD described in Fig. 1F. Data are presented as the mean  $\pm$  SEM,  $n = 3$ ; \*\*\* $P < 0.001$ .

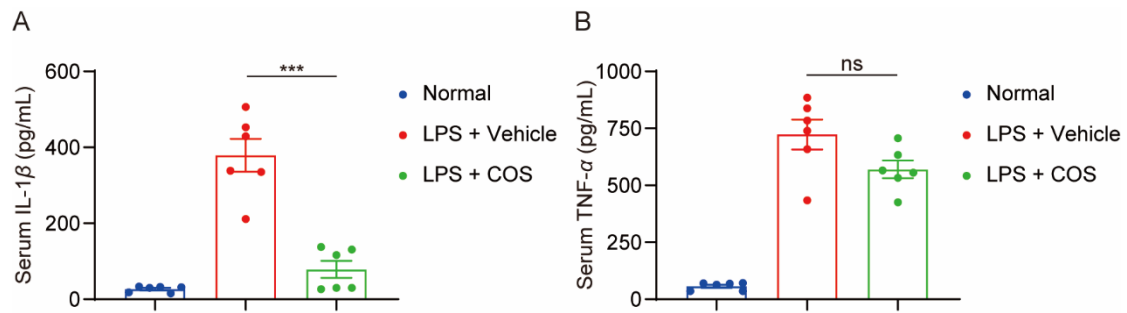

#### Supplementary Figure S4

ELISA of IL-1 $\beta$  (**A**) and TNF- $\alpha$  (**B**) in the serum of mice intraperitoneally injected with LPS (10 mg/kg) and treated with or without COS (40 mg/kg). Data are presented as the mean  $\pm$  SEM,  $n = 6$  per group; \*\*\* $P < 0.001$ ; ns, not significant.

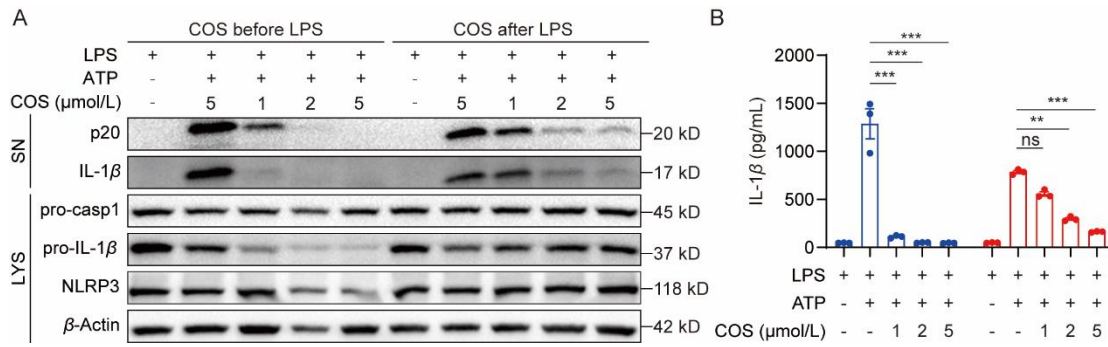

### Supplementary Figure S5

Western blotting analysis of IL-1 $\beta$  and p20 levels (**A**) in SN or ELISA of IL-1 $\beta$  in culture SN (**B**) of BMDMs treated with COS (5  $\mu\text{mol/L}$ ) before or after LPS challenged and stimulated with ATP for 0.5 h. Data are presented as the mean  $\pm$  SEM,  $n = 3$ ;  $**P < 0.01$ ,  $***P < 0.001$ ; ns, not significant.

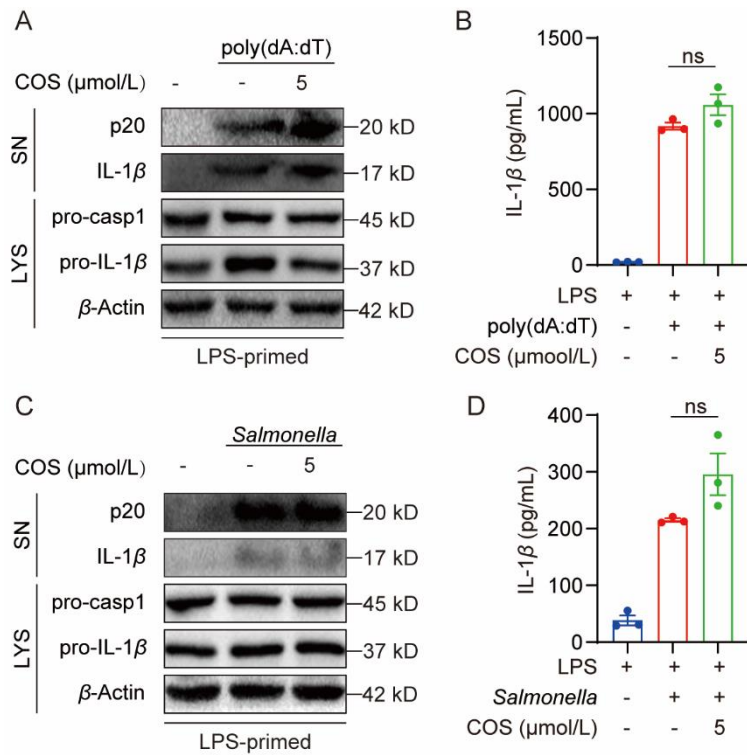

### Supplementary Figure S6

(A, B) Western blotting analysis of IL-1 $\beta$  and p20 levels (A) in SN or ELISA of IL-1 $\beta$  in culture SN (B) of LPS-primed BMDMs treated with of COS (5  $\mu$ mol/L) and stimulated with poly (dA:dT) for 4 h. (C, D) Western blotting analysis of IL-1 $\beta$  and p20 levels (C) or ELISA (D) of IL-1 $\beta$  in culture SN of LPS-primed BMDMs treated with of COS (5  $\mu$ mol/L) and stimulated with *Salmonella* for 4 h. Data are presented as the mean  $\pm$  SEM,  $n = 3$ . ns, not significant.



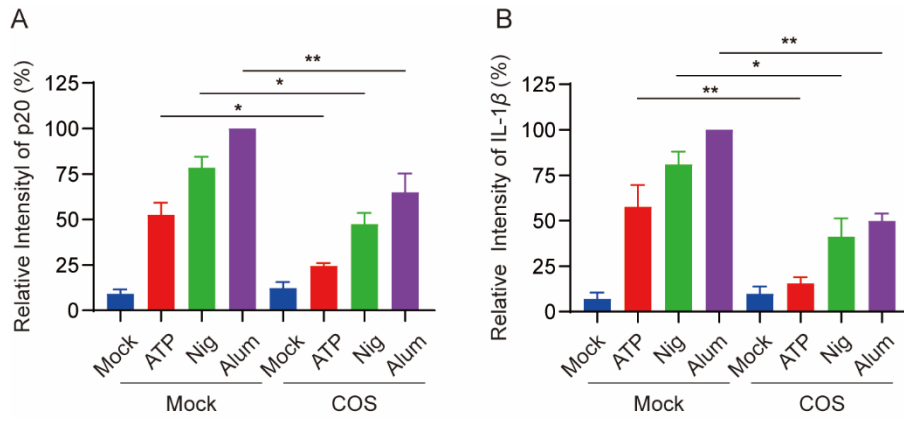

### Supplementary Figure S7

Densitometric quantification of p20 (**A**) and IL-1 $\beta$  (**B**) described in Fig. 1J. Data are presented as the mean  $\pm$  SEM,  $n = 3$ ; \* $P < 0.05$ , \*\* $P < 0.01$ .

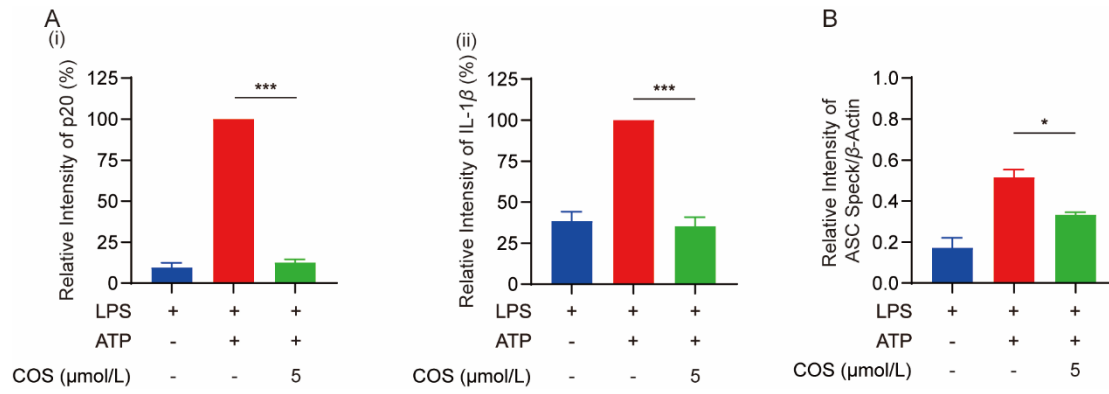

### Supplementary Figure S8

(A) Densitometric quantification of p20 (i) and IL-1 $\beta$  (ii) described in Fig. 2D. (B) Densitometric quantification of ASC Speck described in Fig. 2D. Data are presented as the mean  $\pm$  SEM,  $n = 3$ ; \* $P < 0.05$ , \*\*\* $P < 0.001$ .

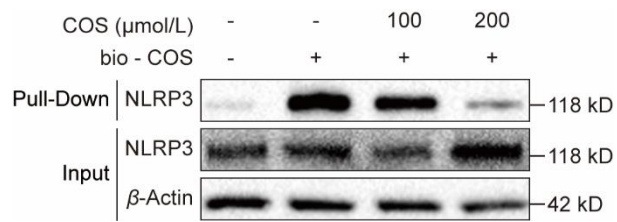

### Supplementary Figure S9

Streptavidin-covered beads with bio-COS (100  $\mu\text{mol/L}$ ) and different concentrations of free COS were incubated with the cell lysates of HEK-293T cells transfected with high expression plasmid of Flag-NLRP3 for 6 h. As indicated, the levels of bound proteins (Pull-down) and total proteins (Input) were determined using western blotting ( $n = 3$ ).

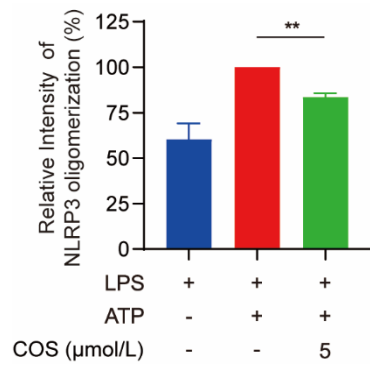

### Supplementary Figure S10

Densitometric quantification of NLRP3 oligomerization described in Fig. 3F. Data are presented as the mean  $\pm$  SEM,  $n = 3$ ;  $**P < 0.01$ .

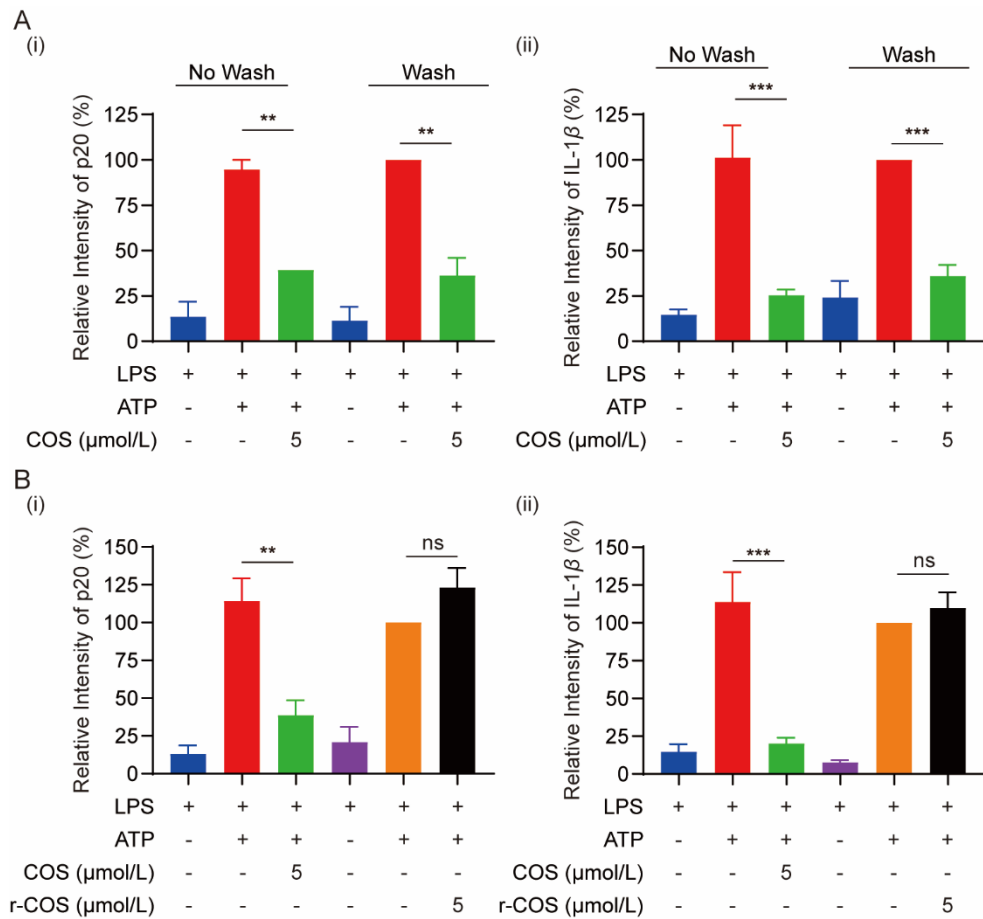

### Supplementary Figure S11

(A) Densitometric quantification of p20 (i) and IL-1 $\beta$  (ii) described in Fig. 4A. (B) Densitometric quantification of ASC Speck described in Fig. 4D. Data are presented as the mean  $\pm$  SEM,  $n = 3$ ; \*\* $P < 0.01$ , \*\*\* $P < 0.001$ ; ns, not significant.

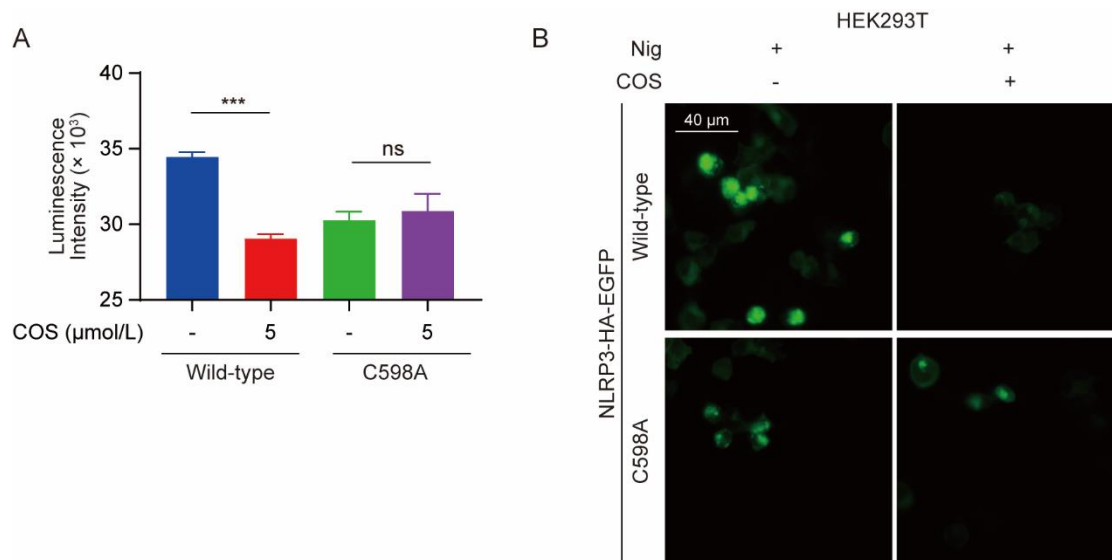

### Supplementary Figure S12

(A) ATPase activity assay for WT or C598A NACHT protein treated with or without COS (5 μmol/L). (B) Fluorescence analysis of HEK-293T cells expressing HA-EGFP-tagged WT or C598A NLRP3 treated with or without COS (5 μmol/L). Data are presented as the mean ± SEM of three separate experiments performed in duplicate ( $n=3$  per group); \*\*\* $P < 0.001$ ; ns, not significant.

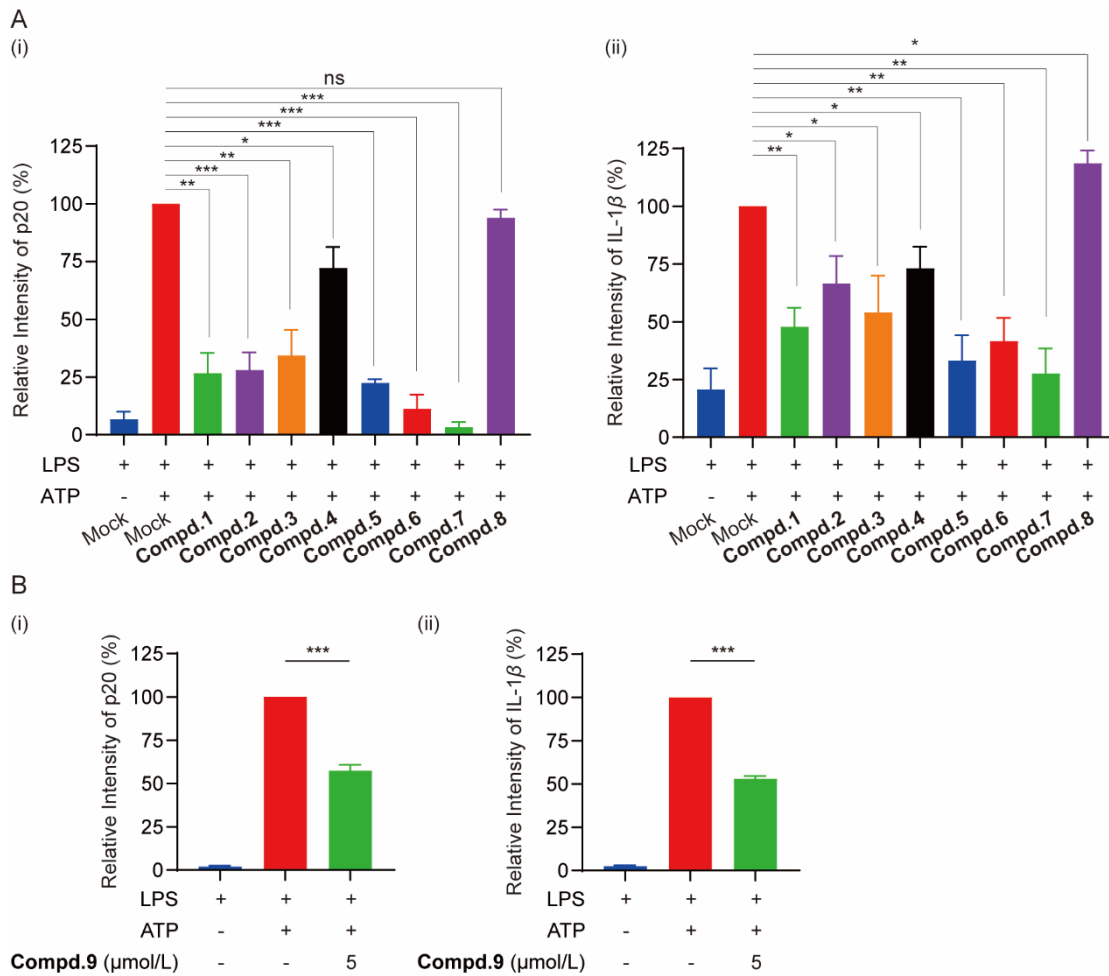

### Supplementary Figure S13

(A) Densitometric quantification of p20 (i) and IL-1 $\beta$  (ii) described in Fig. 5C. (B) Densitometric quantification of p20 (i) and IL-1 $\beta$  (ii) described in Fig. 5F. Data are presented as the mean  $\pm$  SEM,  $n = 3$ ; \* $P < 0.05$ , \*\* $P < 0.01$ , \*\*\* $P < 0.001$ ; ns, not significant.

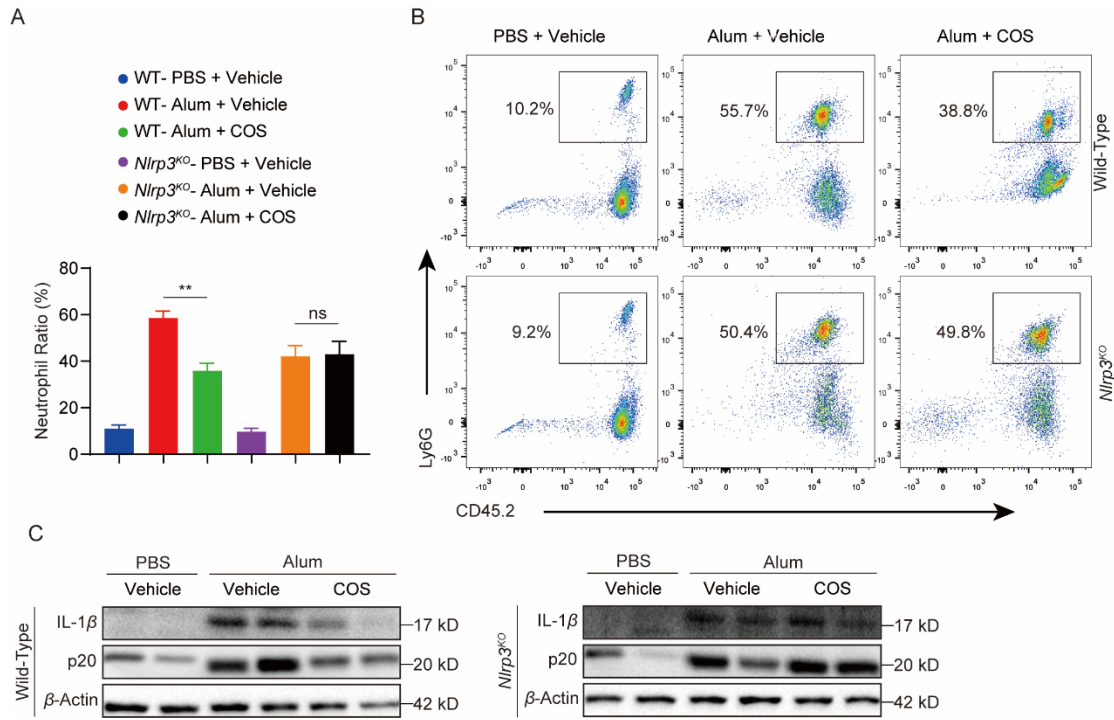

### Supplementary Figure S14

WT or *Nlrp3*<sup>KO</sup> mice were intraperitoneally injected with Alum crystals (1 mg per mouse) in the presence or absence of COS (40 mg/kg).  $n = 6$  per group. **(A)** FACS analysis of neutrophil ratios in the peritoneal cavity. **(B)** Representative figures in FACS analysis. **(C)** Western blotting analysis of mature IL-1 $\beta$  and p20 levels in peritoneal cells from WT or *Nlrp3*<sup>KO</sup> mice. Data are presented as the mean  $\pm$  SEM. \*\* $P < 0.01$ ; ns, not significant.



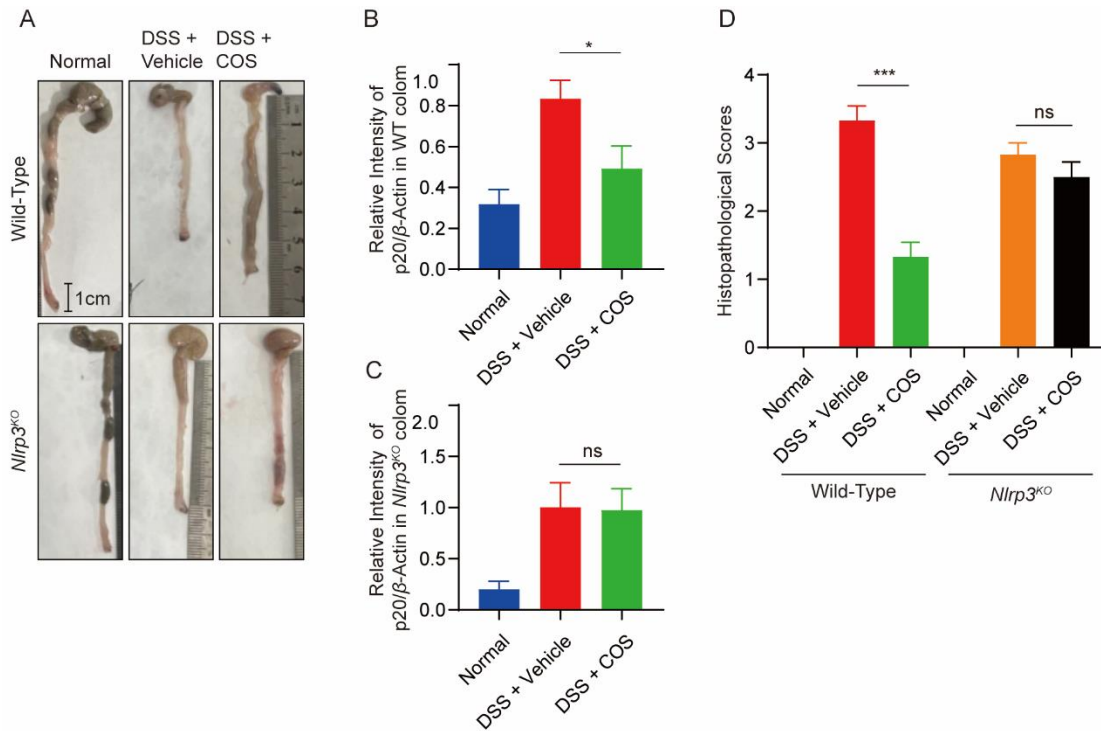

### Supplementary Figure S15

(A) Representative photographs to show the colon length. (B) Densitometric quantification of p20 in WT mice colon described in Fig. 7E. (C) Densitometric quantification of p20 in *Nlrp3<sup>KO</sup>* mice colon described in Fig. 7F. (D) Histopathological scores of paraffin-embedded colon tissues H&E staining. Data are presented as the mean  $\pm$  SEM, ( $n = 6$  per group); \* $P < 0.05$ , \*\*\* $P < 0.001$ ; ns, not significant.
